# Supplementary material for: Associations between hair-derived cannabinoid levels, self-reported use, and cannabis-related problems
Source: Springer Nature journal article supplement (doi:10.1007/s00213-024-06558-0), 2024-02-26
Supplement: MOESM1 [file 213_2024_6558_MOESM1_ESM-2.pdf]

# Supplementary Materials

## Associations between hair-derived cannabinoid levels, self-reported use, and cannabis-related problems

Emese Kroon<sup>1,2</sup>, Janna Cousijn<sup>1,2</sup>, Francesca Filbey<sup>3</sup>, Christian Berchtold<sup>4</sup>, Tina M. Binz<sup>4</sup>, Lauren Kuhns<sup>1</sup>

<sup>1</sup> Department of Psychology, University of Amsterdam, the Netherlands

<sup>2</sup> Neuroscience of Addiction (NofA) Lab, Center for Substance Use and Addiction Research (CESAR), Department of Psychology, Education & Child Studies, Erasmus University Rotterdam, The Netherlands

<sup>3</sup> Department of Psychology, School of Behavioral and Brain Sciences, University of Texas at Dallas, Dallas, TX, USA

<sup>4</sup> Center for Forensic Hair Analytics, Zurich Institute of Forensic Medicine, University of Zurich, Switzerland

**Correspondence:** Emese Kroon, emesekroon@gmail.com, P.O. box 15916, 1001 NK Amsterdam, The Netherlands

**Declarations of interest:** none

**Funding:** This research was supported by grant 1R01 DA042490-01A1 awarded to Janna Cousijn and Francesca Filbey from the National Institute on Drug Abuse/National Institute of Health.

**Author contributions:** All authors reviewed and approved the final version. *Conceptualization:* EK, JC & LK; *Methodology:* EK, JC, CB, TMB, LK; *Investigation:* EK & LK; *Formal Analysis:* EK, CB & TMB; *Data curation:* EK & TMB; *Writing – Original draft:* EK & LK; *Writing – Review & Editing:* JC, FF, CB & TMB; *Visualization:* EK; *Supervision:* JC; *Funding Acquisition:* JC & FF.

**Preregistration.** The study design and the analysis plans were not preregistered.

**Data Accessibility:** The data, code and materials of this study are available from the corresponding author upon reasonable request.

**Price per gram**

How much does the cannabis you typically consume cost? Please state per gram.

..... per gram

**Relative potency**

When comparing it to other types of cannabis you have used, how potent is the cannabis you typically use?

0-----100

**Perceived 'high'**

How strong is the 'high' you get from the cannabis you typically use?

(not strong at all) 1 ----- 5 (very strong)

**Potency category**

Please categorize the potency of the cannabis that you typically use.

- Very mild
- Mild
- Average
- Strong
- Very Strong

**THC percentage category**

How much THC does the cannabis you typically use contain?

- 0-5%
- 5-10%
- 10-15%
- 15-20%
- 20-25%
- 25-30%
- More than 30%

**Figure S1.** Overview of self-report measures of potency

## Analysis of THC-COOH in hair samples with GC-MS/MS

### Chemicals:

Methanol LC-MS grade, ethyl acetate LC-MS grade, N,O-Bis(trimethylsilyl)trifluoroacetamide with 1% trimethylchlorosilane (BSTFA, 1% TMCS) and 11-nor-9-carboxy- $\Delta^9$ -THC were obtained from Merck (Darmstadt, Germany).

### Instrumentation:

An Agilent (Santa Clara, CA, USA) 7890B GC-System equipped with a split/splitless injector, a CTC Analytics (Zwingen, CH) PAL LSI 85 autosampler, and an Agilent 7000C MS Triple Quad with EI ionization were used (using Nitrogen as collision gas). Separation was performed on an Agilent HP-5ms Ultra Inert Column (30m, 0.25mm 0.25  $\mu$ m) using helium as carrier gas.

### Method Details:

GC-MS/MS method parameter:

### Derivatisation

The validation for THC-COOH with GC-MS/MS was performed for the standard method, when 750  $\mu$ L extract was available for hair extraction. LOD and LOQ for this method were 0.2 pg/mg and 1 pg/mg respectively (see table S1).

However, for the retrospective measurement of sample extracts for THC-COOH only 100  $\mu$ L hair extract were available, which were diluted with buffer 1:1 for the initial LC-MS/MS analysis. THC-COOH analysis by GC-MS/MS was performed with this remaining extract. To extrapolate concentrations and do semi-quantitation a calibration was performed in hair sample extracts (100  $\mu$ L), which were prepared the same way as the samples (see Figure S2). For this method LOD and LOQ were also determined and found to be 5 pg/mg and 50 pg/mg (Table S1).

- **750  $\mu$ L** methanolic sample extract (from previous extraction) was dried under nitrogen (60 min. at 35°C)
- Sample extracts after LC-MS/MS analysis (**100  $\mu$ L** extract and **100  $\mu$ L** buffer) were dried under nitrogen (60 min. at 35°C)
- 50  $\mu$ L BSTFA was added to the dried extracts and derivatization was performed for 30 min. at 80°C
- The samples were then transferred to a silanized insert (300  $\mu$ L) and injected into the GC-MS/MS

### GC-MS/MS-method parameters

| Rate °C/min | Temperatur | Hold Time |
|-------------|------------|-----------|
| 0           | 150        | 1         |
| 10          | 300        | 4         |

### Multiple reaction monitoring mode (MRM):

| Time Segment | Cannabinoid          | Precursor Ion | Product Ion | Collision Energy [V] |
|--------------|----------------------|---------------|-------------|----------------------|
| 13.43-13.65  | $\Delta^9$ -THC-COOH | 488.1         | 419.8       | 25                   |
|              |                      | 488.1         | 366.0       | 25                   |

## Limit of detection (LOD) and limit of quantification (LOQ)

| Table S1. LOD and LOQ determined for the different sample extracts |              |              |
|--------------------------------------------------------------------|--------------|--------------|
| Sample extraction volume                                           | LOD<br>pg/mg | LOQ<br>pg/mg |
| THC-COOH<br>(750 µL hair sample extract)                           | 0.2          | 1            |
| THC-COOH<br>(LC-MS/MS sample extract 100 µL+ 100 µL buffer )       | 5            | 50           |

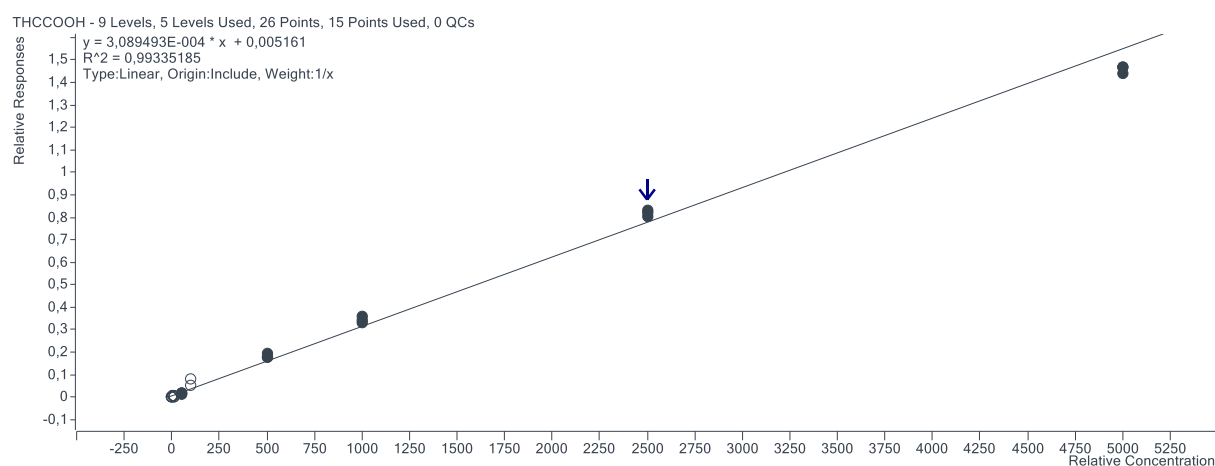

**Figure S2.** Linearity of THC-COOH concentration from LC-MS/MS sample extracts. The calibration was done in spiked LC-MS/MS samples extracts (100 µL spiked extract diluted with 100 µL buffer, dried and derivatized).

### Calibration Range:

|          | Cal 1<br>pg/mg | Cal 2<br>pg/mg | Cal 3<br>pg/mg | Cal 4<br>pg/mg | Cal 5<br>pg/mg |
|----------|----------------|----------------|----------------|----------------|----------------|
| THC-COOH | 50             | 500            | 1000           | 2500           | 5000           |

### Recovery

The recoveries were determined by measuring spiked blank hair samples at two concentrations and compared to the values with a pure standard.

- At 1000 pg/mg, 83.3%
- At 100 pg/mg, 112.1%

**Table S2.** THC-COOH concentrations analysed in cannabis and control group

| Randomized Sample Identifier | THC-COOH in pg/mg | Group    |
|------------------------------|-------------------|----------|
| 1                            | < LOD             | Control  |
| 2                            | < LOD             | Control  |
| 3                            | < LOD             | Control  |
| 4                            | < LOD             | Control  |
| 5                            | < LOD             | Cannabis |
| 6                            | 8                 | Cannabis |
| 7                            | 8                 | Cannabis |
| 8                            | 9                 | Cannabis |
| 9                            | 10                | Cannabis |
| 10                           | 10                | Cannabis |
| 11                           | 13                | Cannabis |
| 12                           | 13                | Cannabis |
| 13                           | 13                | Cannabis |
| 14                           | 16                | Cannabis |
| 15                           | 16                | Cannabis |
| 16                           | 21                | Cannabis |
| 17                           | 30                | Cannabis |
| 18                           | 33                | Cannabis |
| 19                           | 35                | Cannabis |
| 20                           | 40                | Cannabis |
| 21                           | 41                | Cannabis |
| 22                           | 47                | Cannabis |
| 23                           | 48                | Cannabis |
| 24                           | 65                | Cannabis |
| 25                           | 66                | Cannabis |
| 26                           | 72                | Cannabis |
| 27                           | 79                | Cannabis |
| 28                           | 80                | Cannabis |
| 29                           | 83                | Cannabis |
| 30                           | 107               | Cannabis |
| 31                           | 125               | Cannabis |
| 32                           | 149               | Cannabis |
| 33                           | 173               | Cannabis |
| 34                           | 207               | Cannabis |
| 35                           | 213               | Cannabis |
| 36                           | 302               | Cannabis |
| 37                           | 370               | Cannabis |
| 38                           | 375               | Cannabis |
| 39                           | 429               | Cannabis |
| 40                           | 473               | Cannabis |
| 41                           | 495               | Cannabis |
| 42                           | 679               | Cannabis |
| 43                           | 854               | Cannabis |
| 44                           | 1507              | Cannabis |
| 45                           | 1525              | Cannabis |
| 46                           | 1654              | Cannabis |
| 47                           | 2724              | Cannabis |
